# Supplementary material
Source: publisher figshare collection journal article supplement (https://acs.figshare.com/ndownloader/files/12588839)
Supplement: Supplementary file 1 [file 12588839]

# **Incorporation of Anionic Monomer to Tune the Reversible Catechol-Boronate Complex for pH-Responsive, Reversible Adhesion**

## **AUTHOR INFORMATION**

Ameya R. Narkar and Bruce P. Lee\*

Department of Biomedical Engineering, Michigan Technological University, Houghton, MI 49931.

### **\*Corresponding author information:**

Bruce P. Lee, PhD

Email: [bplee@mtu.edu](mailto:bplee@mtu.edu)

Phone: (906) 487-3262

**Scheme S1.** Chemical structures of *N*-hydroxyethyl acrylamide (HEAA), dopamine methacrylamide (DMA), 3-acrylamido phenylboronic acid (APBA), acrylic acid (AAc), methylene bis-acrylamide (MBAA) and 2,2-dimethoxy-2-phenylacetophenone (DMPA).

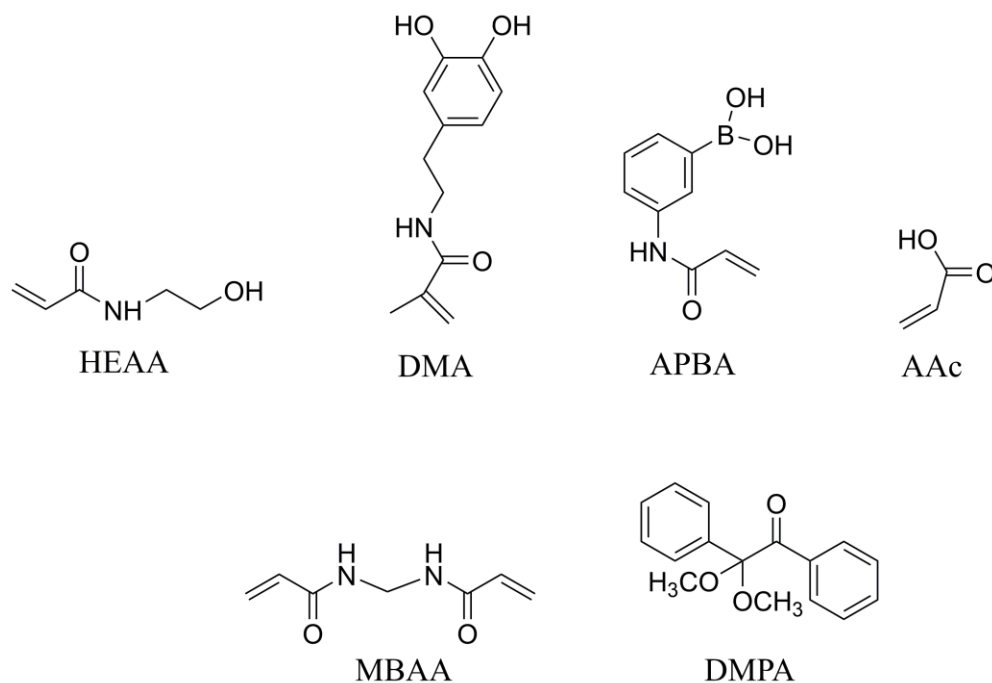

**Table S1.** Statistical analysis for equilibrium swelling ratio of adhesive equilibrated at pH 3.0, 7.5, 8.5 or 9.0 for 24 h. Compositions not connected by the same letter at a given pH are significantly different.

|           | pH 3.0 | pH 7.5 | pH 8.5 | pH 9.0 |
|-----------|--------|--------|--------|--------|
| D10B10A0  | A      | A      | A      | A      |
| D10B10A10 | A B    | B      | B      | B      |
| D10B10A20 | A B    | C      | C      | C      |
| D10B10A30 | B      | B      | D      | C      |

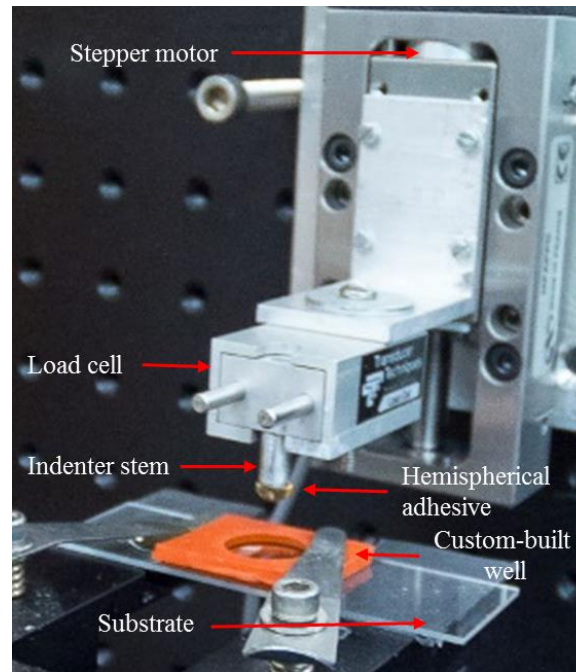

**Figure S1.** Photograph of the contact mechanics setup used for the adhesion experiments.

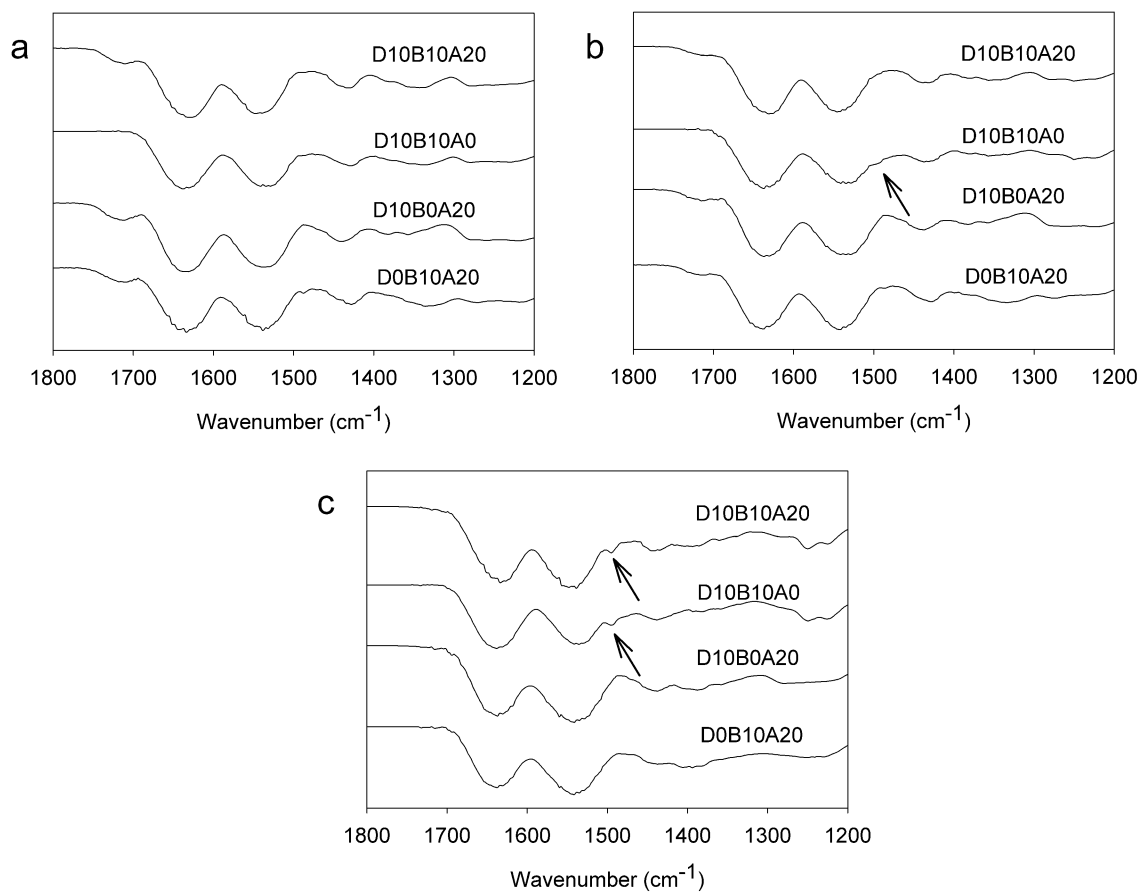

**Figure S2.** FTIR spectra of adhesives equilibrated at pH 3.0 (a), pH 7.5 (b) or pH 9.0 (c). The arrows indicate peaks corresponding to formation of the catechol-boronate complex at  $1490\text{ cm}^{-1}$ .

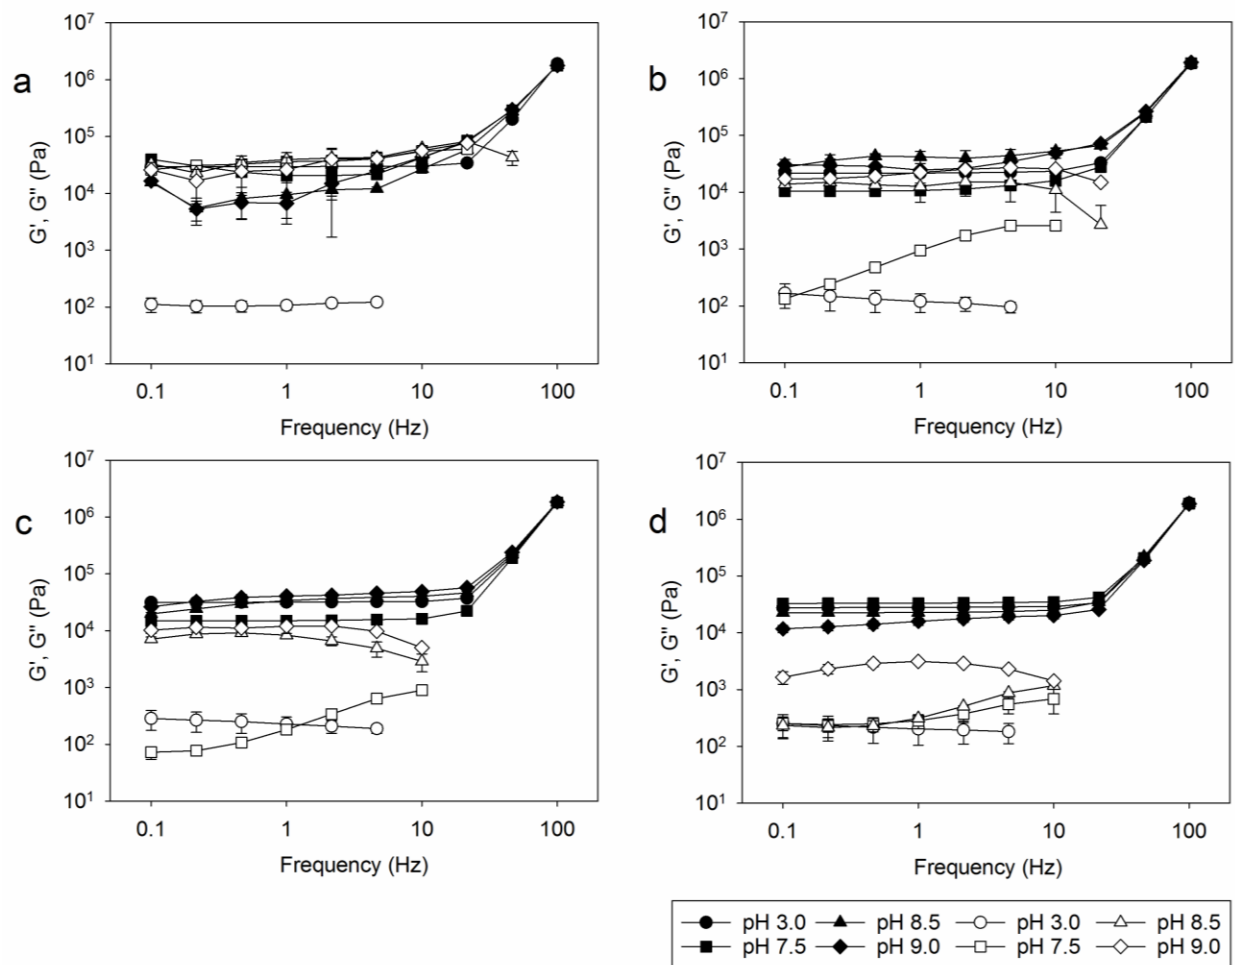

**Figure S3.** Storage ( $G'$ , filled symbols) and loss ( $G''$ , empty symbols) moduli for D10B10A0 (a), D10B10A10 (b), D10B10A20 (c) and D10B10A30 (d) equilibrated at pHs 3.0, 7.5, 8.5 or 9.0 and tested in the frequency range of 0.1-100 Hz and 8 % strain ( $n = 3$ ).

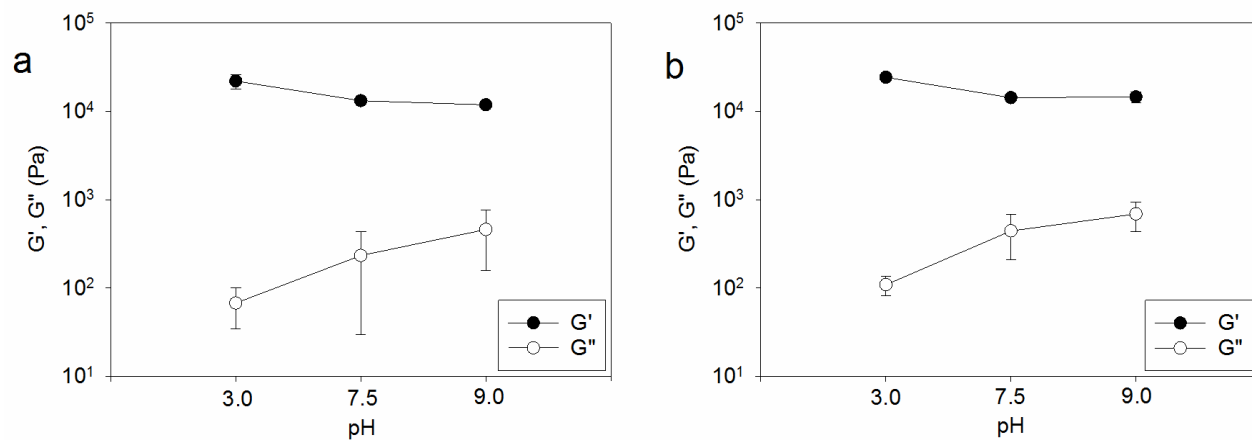

**Figure S4.** Storage ( $G'$ , filled symbols) and loss ( $G''$ , empty symbols) moduli for D0B10A20 (a), and D10B0A20 (b) equilibrated at pHs 3.0, 7.5 or 9.0 tested at a frequency of 1 Hz and 8 % strain ( $n = 3$ ).

**Table S2.** Statistical analysis for work of adhesion ( $W_{adh}$ ) and adhesion strength ( $S_{adh}$ ) of adhesives tested against a wetted quartz substrate. Compositions not connected by the same letter at a given pH are significantly different.

|             | $W_{adh}$ |        |        |        | $S_{adh}$ |        |        |        |
|-------------|-----------|--------|--------|--------|-----------|--------|--------|--------|
| Composition | pH 3.0    | pH 7.5 | pH 8.5 | pH 9.0 | pH 3.0    | pH 7.5 | pH 8.5 | pH 9.0 |
| D10B10A0    | A         | A      | A      | A      | A         | A      | A      | A      |
| D10B10A10   | C         | A      | A B    | A B    | C         | A B    | B      | A      |
| D10B10A20   | A B       | B      | B      | B      | A B       | B      | B      | A      |
| D10B10A30   | B         | B      | B      | B      | B C       | B      | B      | A      |

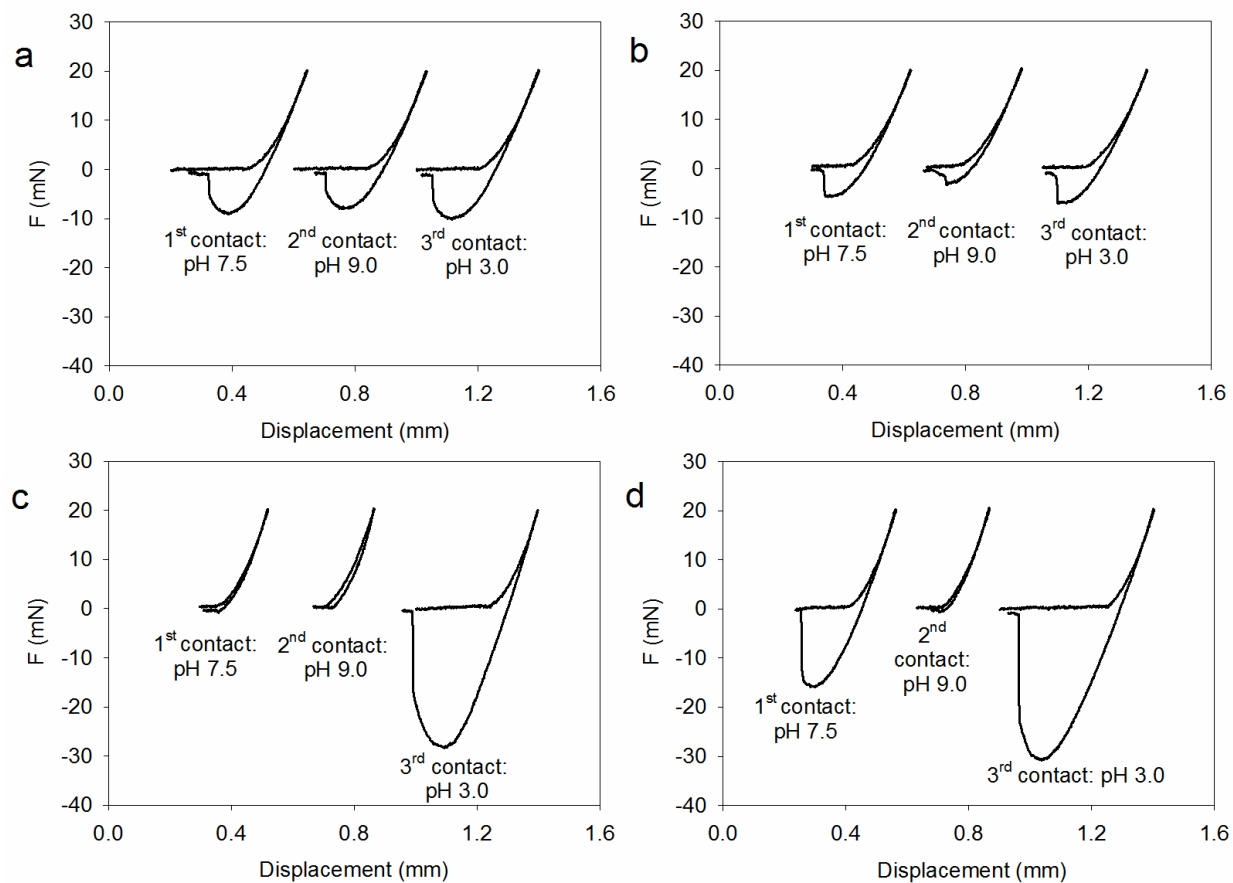

**Figure S5.** Three successive contact curves for D0B10A20 (a), D10B0A20 (b), D10B10A0 (c) and D10B10A20 (d) tested at pH 7.5, pH 9.0, and then pH 3.0 using a quartz substrate.
